# Supplementary material for: Seasonality of interactions between a plant virus and its host during persistent infection in a natural environment
Source: PubMed Central journal article supplement (PMC6976672; doi:10.1038/s41396-019-0519-4), 2019-10-30
Supplement: 41396_2019_519_MOESM1_ESM.pdf [file 41396_2019_519_MOESM1_ESM.pdf]

1

## **Supplementary Materials and Methods**

2

3 **Seasonality of interactions between a plant virus and its host during persistent**

4 **infection in a natural environment**

5

6 Mie N. Honjo, Naoko Emura, Tetsuhiro Kawagoe, Jiro Sugisaka, Mari Kamitani,

7 Atsushi J. Nagano, and Hiroshi Kudoh

8

9 **RNA-extraction.**

10 In the leaf samples from the three-year time-series observation, total RNA was extracted  
11 using an RNeasy Plant Mini Kit (Qiagen, Hilden, Germany) without DNase treatment,  
12 according to the manufacturer's instruction. For RT-qPCR, the extracted RNA samples  
13 were treated with DNase I (Takara, Tokyo, Japan) and then purified using AMpure XP  
14 beads (Beckman, Brea, CA, USA). For RNA-Seq, the extracted RNA samples were used  
15 directly for library preparations. In other samples, total RNA was extracted with a  
16 Maxwell® 16 instrument using Maxwell® 16 LEV Plant RNA kit according to the  
17 manufacturer's instructions (Promega, Madison, WI, USA). The leaves were completely  
18 crushed with cylinder-shaped metal beads using Multi beads shocker (Yasui Kikai, Osaka,  
19 Japan). The amount of RNA was measured by Qubit Fluorometer using Quant-iT™ RNA  
20 Assay Kit (Life Technologies) or by Quantus Fluorometer using QuantiFluor® RNA  
21 System (Promega), and the quality was assessed using a Bioanalyzer (Agilent  
22 Technologies, Santa Clara, CA, USA).

23

24 **RT-qPCR.**

25 To quantify TuMV amount in leaves, RT-qPCR was performed by the following  
26 procedure. Total RNA (200 ng) was reverse transcribed in a 20 µL reaction (High-

27 Capacity cDNA Reverse Transcription Kit, Life Technologies) with oligo dT primer  
28 according to the manufacturer's instructions. The qPCR was performed with 1µL of the  
29 cDNA using the QuantStudio 7 (Applied Biosystems, Foster City, CA, USA). The amount  
30 of TuMV RNA was calculated relative to a pre-prepared standard cDNA sample which  
31 we included in all qPCR trials. Primers TuMVCP-F (5'-  
32 TGGCTGATTACGAACTGACG-3', designed here) and CP-R (5'-  
33 CTGCCTAAATGTGGGTTTGG-3')<sup>[1]</sup> were used for TuMV detection. We used  
34 *AhgActin2* and *AhgPP2AA3* as reference genes for normalization of the three-year time-  
35 series samples and other samples, respectively. Primers of these genes were AhgACT2F:  
36 5'-TCCCTCAGCACATTCCAGCAGAT-3' and AhgACT2R: 5'-  
37 AACGATTCCTGGACCTGCCTCATC-3'<sup>[2]</sup> and AhgPP2AA3-F: 5'-  
38 GTATGCACATGTTTTGCTTCCAC-3' and AhgPP2AA3-R: 5'-  
39 CAACCAAGTCATTCTCCCTCATC-3'<sup>[3]</sup>, respectively. The standard cDNA of TuMV  
40 was prepared from total RNA, which was extracted from pooled infected leaves (ca. 10  
41 leaves) of *A. halleri*. The standard cDNA of *AhgActin2* and *AhgPP2AA3* was prepared  
42 from pooled un-infected leaves (ca. 10 leaves). Dilution series of the standard cDNA were  
43 amplified in duplicate with samples for all qPCR, and we used nine and six dilution levels,  
44 i.e., 10<sup>0</sup>–10<sup>8</sup> and 5<sup>0</sup>–5<sup>5</sup>, for TuMV and the reference genes, respectively. Each PCR

45 reaction contained 1  $\mu$ L of cDNA solution, 200 nM primers, and Fast SYBR Green Master  
46 Mix (Applied Biosystems) in a final volume of 10  $\mu$ L. The PCR conditions were as  
47 follows: 20 s at 95  $^{\circ}$ C and 40 cycles of 1 s at 95  $^{\circ}$ C and 20 s at 60  $^{\circ}$ C. Two technical  
48 replicates were prepared for each sample. To evaluate whether PCR products were single  
49 or not, a melt-curve was obtained for each sample by a gradual increase of temperature  
50 of 0.05  $^{\circ}$ C/s from 60  $^{\circ}$ C to 95  $^{\circ}$ C.

51 To confirm the replication activity of TuMV, negative strand RNA of the virus was  
52 quantified by strand-specific RT-qPCR<sup>[4]</sup>. We used primers that were designed based on  
53 the TuMV sequences at the study site using the Primer Express program (Applied  
54 Biosystems). Briefly, 100 ng of total RNA were reverse transcribed in the presence of 250  
55 nM RT primer which specifically anneal to the negative (-) strand RNA; TuMV-I [5'-  
56 GGCCGTCATGGTGGCGAATAATACGTGCGAGAGAAGCACACA-3'. Underlined  
57 and non-underlined sequences represent nonviral 5' tag sequences and those homologous  
58 to TuMV, respectively] with Superscript III reverse transcriptase (Invitrogen) in 10  $\mu$ L  
59 reactions for 30 min at 55  $^{\circ}$ C. Previous to the reaction, primers were allowed to anneal by  
60 incubating 5 min at 70  $^{\circ}$ C and snap cooling on ice. The reverse transcription reaction was  
61 stopped by heating at 85  $^{\circ}$ C for 10 min. Specific qPCR was performed in a 10  $\mu$ L final  
62 volume using the Fast SYBR Green Master Mix reagent (Applied Biosystems) with the

63 same conditions described above. In this specific qPCR, TuMV (-) RNA was quantified  
64 from 1  $\mu$ L cDNA using a set of primers (500 nM for each); i.e., TuMV-II (5'-  
65 *AATAAATCATAAGGCCGTCATGGTGGCGAATAA*-3', underlined sequences are  
66 identical with 5' tag of PII)<sup>[4]</sup> and TuMV-III (5'-  
67 *AATAAATCATAAATTTGTTTCGGCTTGGATGGA*-3', sequence complementary to  
68 TuMV). Primers TuMV-II and TuMV-III contained 5' flaps (italicized sequence) to  
69 improve qPCR<sup>[5]</sup>. The series of standard cDNA at 1, 1/2, 1/4, 1/8, and 1/16 dilutions were  
70 included in all analyses. Two replicates were performed for each sample and standard.

71

## 72 **RNA-Seq analysis.**

73 We used previously published RNA-Seq data (accession number; DRA005871,  
74 DRA005872, DRA005873)<sup>[6]</sup>, and newly obtained data (accession number; DRA008908)  
75 for TuMV detection from the three-year time-series observations (described in detail in  
76 main text). For RNA-Seq library preparation of samples from the three-year time-series  
77 observations, the modified high-throughput method was used<sup>[7]</sup>. Quantification of TuMV  
78 amount expression from by the RNA-Seq data was conducted as follows<sup>[8]</sup>. Pre-  
79 processing and quality filtering were performed by trimmomatic-v0.32<sup>[9]</sup>. Virus genome  
80 sequences, including TuMV (Complete genome sequences of 3,981 viruses, obtained

81 from the NCBI GenBank were used as the virus reference sequences.); *A. halleri*  
82 transcript sequences (32,648 genes, Dryad Digital Repository, doi:  
83 10.5061/dryad.4pf96)<sup>[10]</sup>; and ERCC spike in control (Life Technologies) were used as  
84 reference sequences. Details of the preparation strategy of the references were described  
85 in our previous study<sup>[8]</sup>. The pre-processed sequences were mapped on the reference and  
86 quantified using RSEM-1.2.11<sup>[11]</sup>. The output of RSEM was analysed using R 3.1.1  
87 software<sup>[12]</sup>. The TuMV amount was calculated as RPM Calculation of RPM (read per  
88 million) values based on the expected count values of RSEM. The number of virus reads  
89 was so large that the total read number was very different between infected and non-  
90 infected plants. Therefore, we used the total reads derived from host genes, except for  
91 rRNA, as a denominator, instead of the total reads including virus reads<sup>[8]</sup>. The removal  
92 of the effects of missorted reads in quantification was performed as described in our  
93 previous study<sup>[8]</sup>.

94

## 95 **References**

- 96 1. Wei T, Zhang C, Hou X, Sanfaçon H, Wang A. The SNARE protein Syp71 is  
97 essential for *Turnip mosaic virus* infection by mediating fusion of virus-induced  
98 vesicles with chloroplasts. *PLoS Pathog* 2013; **9**: e1003378.
- 99 2. Aikawa S, Kobayashi MJ, Satake A, Shimizu KK, Kudoh H. Robust control of the

- 100 seasonal expression of the *Arabidopsis FLC* gene in a fluctuating environment.  
101 *Proc Natl Acad Sci U S A.* 2010; **107**: 11632-11637.
- 102 3. Nishio H, Buzas DM, Nagano AJ, Suzuki Y, Sugano S, Ito M *et al.* From the  
103 laboratory to the field: assaying histone methylation at *FLOWERING LOCUS C* in  
104 naturally growing *Arabidopsis halleri*. *Genes Genet Syst* 2016; **91**: 15-26.
- 105 4. Martinez F, Sardanyés J, Elena SF, Daròs J-A. Dynamics of a plant RNA virus  
106 intracellular accumulation: stamping machine vs. geometric replication. *Genetics*  
107 2011; **188**: 637-646.
- 108 5. Afonina I, Ankoudinova I, Mills A, Lokhov S, Huynh P, Mahoney W. Primers with  
109 5' flaps improve real-time PCR. *Biotechniques* 2007; **43**: 770-774.
- 110 6. Nagano AJ, Kawagoe T, Sugisaka J, Honjo MN, Iwayama K, Kudoh H. Annual  
111 transcriptome dynamics in natural environments reveals plant seasonal adaptation.  
112 *Nat Plants* 2019; **5**: 74-83.
- 113 7. Wang L, Si Y, Dedow LK, Shao Y, Liu P, Brutnell TP. A low-cost library construction  
114 protocol and data analysis pipeline for Illumina-based strand-specific multiplex  
115 RNA-seq. *Plos One* 2011; **6**: e26426.
- 116 8. Kamitani M, Nagano AJ, Honjo MN, Kudoh H. RNA-Seq reveals virus-virus and  
117 virus-plant interactions in nature. *FEMS Microbiol Ecol* 2016; **92**: fiw176.
- 118 9. Bolger AM, Lohse M, Usadel B. Trimmomatic: a flexible trimmer for Illumina  
119 sequence data. *Bioinformatics* 2014; **30**: 2114-2120.

- 120 10. Kamitani M, Nagano AJ, Honjo MN, Kudoh H. Data from: RNA-Seq reveals virus–  
121 virus and virus–plant interactions in nature. *Dryad Digital Repository* 2016; doi:  
122 10.5061/dryad.4pf96
- 123 11. Li B, Dewey CN. RSEM: accurate transcript quantification from RNA-Seq data  
124 with or without a reference genome. *BMC Bioinformatics* 2011; **12**: 323.
- 125 12. R Development Core Team. *R: A Language and Environment for Statistical*  
126 *Computing*. <http://www.R-project.org> (R Foundation for Statistical Computing,  
127 Vienna, 2011).
- 128
