# Supplementary material for: Seasonality of interactions between a plant virus and its host during persistent infection in a natural environment
Source: PubMed Central journal article supplement (PMC6976672; doi:10.1038/s41396-019-0519-4), 2019-10-30
Supplement: 41396_2019_519_MOESM3_ESM.pdf [file 41396_2019_519_MOESM3_ESM.pdf]

Supplementary Table S1. List of samples used in the three-year time-series observation on TuMV abundance. + represents samples used in the corresponding analyses. \* indicates previously published RNA-Seq data (Nagano *et al.* 2019; accession number; DRA005871, DRA005872, DRA005873), and others are newly obtained data (accession number; DRA008908) in this study.

| Plant patch | Sampling date | qPCR | Strand specific qPCR (-) | RNA-seq | TuMV read-cover rate (depth $\geq 3$ , RNA-seq) | phylogenetic analysis (read-cover > 90.0) |
|-------------|---------------|------|--------------------------|---------|-------------------------------------------------|-------------------------------------------|
| P1          | 2012/9/25     | +    | +                        | +*      | 23.8                                            |                                           |
| P1          | 2012/10/4     |      |                          | +*      | 95.7                                            | +                                         |
| P1          | 2012/10/23    | +    | +                        | +*      | 63.3                                            |                                           |
| P1          | 2012/10/30    |      |                          | +*      | 0                                               |                                           |
| P1          | 2012/11/6     | +    |                          | +*      | 41.4                                            |                                           |
| P1          | 2012/11/13    |      |                          | +*      | 0                                               |                                           |
| P1          | 2012/11/21    | +    | +                        | +*      | 96.9                                            | +                                         |
| P1          | 2012/11/27    |      |                          | +*      | 15.5                                            |                                           |
| P1          | 2012/12/4     | +    |                          | +*      | 87.0                                            |                                           |
| P1          | 2012/12/11    |      |                          | +*      | 21.8                                            |                                           |
| P1          | 2012/12/18    | +    | +                        | +*      | 0                                               |                                           |
| P1          | 2012/12/25    |      |                          | +*      | 0                                               |                                           |
| P1          | 2013/1/8      | +    |                          | +*      | 0                                               |                                           |
| P1          | 2013/1/15     |      |                          | +*      | 0                                               |                                           |
| P1          | 2013/1/22     | +    | +                        | +*      | 0                                               |                                           |
| P1          | 2013/1/29     |      |                          | +*      | 12.8                                            |                                           |
| P1          | 2013/2/5      | +    |                          | +*      | 0                                               |                                           |
| P1          | 2013/2/12     |      |                          | +*      | 1.0                                             |                                           |
| P1          | 2013/2/19     | +    |                          | +*      | 52.0                                            |                                           |
| P1          | 2013/2/26     |      | +                        | +*      | 41.3                                            |                                           |
| P1          | 2013/3/7      | +    |                          | +*      | 0                                               |                                           |
| P1          | 2013/3/12     |      |                          | +*      | 2.0                                             |                                           |
| P1          | 2013/3/19     | +    | +                        | +*      | 53.3                                            |                                           |
| P1          | 2013/3/26     |      |                          | +*      | 56.0                                            |                                           |
| P1          | 2013/4/2      | +    |                          | +*      | 87.1                                            |                                           |
| P1          | 2013/4/9      |      |                          | +*      | 77.1                                            |                                           |
| P1          | 2013/4/16     | +    | +                        | +*      | 86.6                                            |                                           |
| P1          | 2013/4/23     |      |                          | +*      | 93.3                                            | +                                         |
| P1          | 2013/4/30     | +    |                          | +*      | 98.7                                            | +                                         |
| P1          | 2013/5/7      |      |                          | +*      | 99.4                                            | +                                         |
| P1          | 2013/5/13     | +    | +                        | +*      | 99.4                                            | +                                         |
| P1          | 2013/5/21     |      |                          | +*      | 99.3                                            | +                                         |
| P1          | 2013/5/28     | +    |                          | +*      | 98.9                                            | +                                         |
| P1          | 2013/6/4      |      |                          | +*      | 98.8                                            | +                                         |
| P1          | 2013/6/11     | +    | +                        | +*      | 99.0                                            | +                                         |
| P1          | 2013/6/19     |      |                          | +*      | 99.0                                            | +                                         |
| P1          | 2013/6/26     | +    |                          | +*      | 99.2                                            | +                                         |
| P1          | 2013/7/9      | +    | +                        |         |                                                 |                                           |
| P1          | 2013/7/23     | +    |                          |         |                                                 |                                           |
| P1          | 2013/8/6      | +    | +                        |         |                                                 |                                           |
| P1          | 2013/8/20     | +    |                          |         |                                                 |                                           |
| P1          | 2013/9/17     | +    | +                        |         |                                                 |                                           |
| P1          | 2013/10/1     | +    |                          |         |                                                 |                                           |
| P1          | 2013/10/15    | +    | +                        | +       | 87.8                                            |                                           |
| P1          | 2013/10/29    | +    |                          |         |                                                 |                                           |
| P1          | 2013/11/12    | +    | +                        |         |                                                 |                                           |
| P1          | 2013/11/26    | +    |                          | +       | 81.9                                            |                                           |
| P1          | 2013/12/10    | +    | +                        |         |                                                 |                                           |
| P1          | 2013/12/24    | +    |                          |         |                                                 |                                           |
| P1          | 2014/1/14     | +    | +                        |         |                                                 |                                           |
| P1          | 2014/1/28     | +    |                          | +       | 65.3                                            |                                           |
| P1          | 2014/2/11     | +    | +                        |         |                                                 |                                           |
| P1          | 2014/2/25     | +    |                          |         |                                                 |                                           |
| P1          | 2014/3/11     | +    | +                        |         |                                                 |                                           |
| P1          | 2014/3/25     | +    |                          |         |                                                 |                                           |
| P1          | 2014/4/7      | +    | +                        |         |                                                 |                                           |
| P1          | 2014/4/22     | +    |                          |         |                                                 |                                           |
| P1          | 2014/5/9      | +    | +                        | +       | 89.7                                            |                                           |
| P1          | 2014/5/20     | +    |                          |         |                                                 |                                           |
| P1          | 2014/6/3      | +    | +                        |         |                                                 |                                           |
| P1          | 2014/6/16     | +    |                          |         |                                                 |                                           |
| P1          | 2014/7/1      | +    | +                        | +       | 91.6                                            | +                                         |
| P1          | 2014/7/15     | +    |                          |         |                                                 |                                           |
| P1          | 2014/7/29     | +    | +                        |         |                                                 |                                           |
| P1          | 2014/8/11     | +    |                          |         |                                                 |                                           |
| P1          | 2014/8/26     | +    | +                        | +       | 0                                               |                                           |
| P1          | 2014/9/9      | +    |                          |         |                                                 |                                           |
| P1          | 2014/9/22     | +    | +                        | +       | 97.2                                            | +                                         |
| P1          | 2014/10/7     | +    |                          |         |                                                 |                                           |
| P1          | 2014/10/21    | +    | +                        | +       | 96.9                                            | +                                         |
| P1          | 2014/10/28    | +    |                          |         |                                                 |                                           |

|    |            |   |   |   |      |  |   |
|----|------------|---|---|---|------|--|---|
| P1 | 2014/11/11 | + |   |   |      |  |   |
| P1 | 2014/11/25 | + | + |   |      |  |   |
| P1 | 2014/12/9  | + |   |   |      |  |   |
| P1 | 2014/12/22 | + | + |   |      |  |   |
| P1 | 2015/1/6   | + |   |   |      |  |   |
| P1 | 2015/1/20  | + | + |   |      |  |   |
| P1 | 2015/2/3   | + |   | + | 66.4 |  |   |
| P1 | 2015/2/17  | + | + |   |      |  |   |
| P1 | 2015/3/3   | + |   |   |      |  |   |
| P1 | 2015/3/17  | + | + | + | 0    |  |   |
| P1 | 2015/4/1   | + |   |   |      |  |   |
| P1 | 2015/4/14  | + | + |   |      |  |   |
| P1 | 2015/4/28  | + |   |   |      |  |   |
| P1 | 2015/5/12  | + | + | + | 92.4 |  | + |
| P1 | 2015/5/26  | + | + |   |      |  |   |
| P1 | 2015/6/9   | + |   |   |      |  |   |
| P1 | 2015/6/23  | + |   |   |      |  |   |
| P1 | 2015/7/7   | + |   |   |      |  |   |
| P1 | 2015/7/21  | + |   |   |      |  |   |
| P1 | 2015/8/4   | + |   |   |      |  |   |
| P1 | 2015/8/18  | + | + | + | 99.1 |  | + |
| P1 | 2015/9/1   | + |   |   |      |  |   |
| P1 | 2015/9/15  | + | + |   |      |  |   |
| P1 | 2015/9/29  | + |   |   |      |  |   |
| P2 | 2012/9/25  | + | + | + | 98.1 |  | + |
| P2 | 2012/10/4  |   |   | + | 33.2 |  |   |
| P2 | 2012/10/23 | + | + | + | 65.9 |  |   |
| P2 | 2012/10/30 |   |   | + | 42.1 |  |   |
| P2 | 2012/11/6  | + |   | + | 96.2 |  | + |
| P2 | 2012/11/13 |   |   | + | 69.4 |  |   |
| P2 | 2012/11/21 | + | + | + | 0    |  |   |
| P2 | 2012/11/27 |   |   | + | 0    |  |   |
| P2 | 2012/12/4  | + |   | + | 0    |  |   |
| P2 | 2012/12/11 |   |   | + | 72.6 |  |   |
| P2 | 2012/12/18 | + | + | + | 19.4 |  |   |
| P2 | 2012/12/25 |   |   | + | 0    |  |   |
| P2 | 2013/1/8   | + |   | + | 0    |  |   |
| P2 | 2013/1/15  |   |   | + | 1.5  |  |   |
| P2 | 2013/1/22  | + | + | + | 0    |  |   |
| P2 | 2013/1/29  |   |   | + | 81.9 |  |   |
| P2 | 2013/2/5   | + |   | + | 0    |  |   |
| P2 | 2013/2/12  |   |   | + | 0    |  |   |
| P2 | 2013/2/19  | + |   | + | 0    |  |   |
| P2 | 2013/2/26  |   | + | + | 0    |  |   |
| P2 | 2013/3/7   |   |   | + | 0    |  |   |
| P2 | 2013/3/12  |   |   | + | 0    |  |   |
| P2 | 2013/3/19  | + | + | + | 0.5  |  |   |
| P2 | 2013/3/26  |   |   | + | 11.9 |  |   |
| P2 | 2013/4/2   | + |   | + | 95.5 |  | + |
| P2 | 2013/4/9   |   |   | + | 94.8 |  | + |
| P2 | 2013/4/16  | + | + | + | 89.0 |  |   |
| P2 | 2013/4/23  |   |   | + | 96.3 |  | + |
| P2 | 2013/4/30  | + |   | + | 99.4 |  | + |
| P2 | 2013/5/7   |   |   | + | 99.3 |  | + |
| P2 | 2013/5/13  | + | + | + | 99.7 |  | + |
| P2 | 2013/5/21  |   |   | + | 0    |  |   |
| P2 | 2013/5/28  | + |   | + | 98.8 |  | + |
| P2 | 2013/6/4   |   |   | + | 97.0 |  | + |
| P2 | 2013/6/11  | + | + | + | 99.4 |  | + |
| P2 | 2013/6/19  |   |   | + | 99.4 |  | + |
| P2 | 2013/6/26  | + |   | + | 99.4 |  | + |
| P2 | 2013/7/9   | + | + |   |      |  |   |
| P2 | 2013/7/23  | + |   |   |      |  |   |
| P2 | 2013/8/6   | + | + |   |      |  |   |
| P2 | 2013/8/20  | + |   |   |      |  |   |
| P2 | 2013/9/17  | + | + |   |      |  |   |
| P2 | 2013/10/1  | + |   |   |      |  |   |
| P2 | 2013/10/15 | + | + | + | 98.8 |  | + |
| P2 | 2013/10/29 | + |   |   |      |  |   |
| P2 | 2013/11/12 | + | + |   |      |  |   |
| P2 | 2013/11/26 | + |   | + | 89.2 |  |   |
| P2 | 2013/12/10 | + | + |   |      |  |   |
| P2 | 2013/12/24 | + |   |   |      |  |   |
| P2 | 2014/1/14  | + | + | + | 65.9 |  |   |
| P3 | 2014/4/22  | + |   |   |      |  |   |
| P3 | 2014/5/9   | + | + | + | 91.9 |  | + |
| P3 | 2014/5/20  | + |   |   |      |  |   |
| P3 | 2014/6/3   | + | + | + | 0.0  |  |   |
| P3 | 2014/6/16  | + |   |   |      |  |   |

|    |            |   |   |   |      |   |
|----|------------|---|---|---|------|---|
| P3 | 2014/7/1   | + | + |   |      |   |
| P3 | 2014/7/15  | + |   |   |      |   |
| P3 | 2014/7/29  | + |   |   |      |   |
| P3 | 2014/8/11  | + | + | + | 98.4 | + |
| P3 | 2014/8/26  | + | + |   |      |   |
| P3 | 2014/9/9   | + |   |   |      |   |
| P3 | 2014/9/22  | + | + | + | 97.3 | + |
| P3 | 2014/10/7  | + |   |   |      |   |
| P3 | 2014/10/21 | + | + |   |      |   |
| P3 | 2014/10/28 | + |   |   |      |   |
| P3 | 2014/11/11 | + |   | + | 97.8 | + |
| P3 | 2014/11/25 | + | + |   |      |   |
| P3 | 2014/12/9  | + |   |   |      |   |
| P3 | 2014/12/22 | + | + |   |      |   |
| P3 | 2015/1/6   | + |   | + | 47.0 |   |
| P3 | 2015/1/20  | + | + |   |      |   |
| P3 | 2015/2/3   | + |   |   |      |   |
| P3 | 2015/2/17  | + | + |   |      |   |
| P3 | 2015/3/3   | + |   |   |      |   |
| P3 | 2015/3/17  | + | + |   |      |   |
| P3 | 2015/4/1   | + |   |   |      |   |
| P3 | 2015/4/14  | + | + | + | 98.7 | + |
| P3 | 2015/4/28  | + |   |   |      |   |
| P3 | 2015/5/12  | + | + | + | 0    |   |
| P3 | 2015/5/26  | + |   |   |      |   |
| P3 | 2015/6/9   | + |   |   |      |   |
| P3 | 2015/6/23  | + | + |   |      |   |
| P3 | 2015/7/7   | + |   |   |      |   |
| P3 | 2015/7/21  | + | + |   |      |   |
| P3 | 2015/8/4   | + |   |   |      |   |
| P3 | 2015/8/18  | + |   |   |      |   |
| P3 | 2015/9/1   | + | + |   |      |   |
| P3 | 2015/9/15  | + | + |   |      |   |
| P3 | 2015/9/29  | + |   | + | 90.5 | + |

---

Supplementary Table S2. List of samples used in field observation of TuMV amounts in leaves at different positions within plants.

| Sampling date | Plant ID | Plant stage          | Leaf numbers |
|---------------|----------|----------------------|--------------|
| 2015/12/22    | 1        | Rosette              | 11           |
| 2015/12/22    | 2        | Rosette              | 17           |
| 2015/12/22    | 3        | Rosette              | 17           |
| 2015/12/22    | 4        | Rosette              | 12           |
| 2016/2/23     | 5        | Rosette              | 11           |
| 2016/2/23     | 6        | Rosette              | 17           |
| 2016/2/23     | 7        | Rosette              | 10           |
| 2016/2/23     | 8        | Rosette              | 11           |
| 2016/4/19     | 9        | Flowering            | 14           |
| 2016/4/19     | 10       | Flowering            | 12           |
| 2016/4/19     | 11       | Flowering            | 8            |
| 2016/4/19     | 12       | Flowering            | 14           |
| 2016/6/21     | 13       | Newly-formed rosette | 9            |
| 2016/6/21     | 14       | Newly-formed rosette | 9            |
| 2016/6/21     | 15       | Newly-formed rosette | 10           |
| 2016/6/21     | 16       | Newly-formed rosette | 10           |

Supplementary Table S3. Haplotype diversity, nucleotide polymorphism ( $\theta$ ) and nucleotide diversity ( $\pi$ ) of TuMV sequences calculated for among and within pant patches.

|                                         | Among plant patches<br>(Within population)           | Within plant patches                                 |                                                      |                                                      |
|-----------------------------------------|------------------------------------------------------|------------------------------------------------------|------------------------------------------------------|------------------------------------------------------|
|                                         |                                                      | P1                                                   | P2                                                   | P3                                                   |
| Haplotype diversity (Hd)                | 1.00                                                 | 0.60                                                 | 0.79                                                 | 1.00                                                 |
| Nucleotide polymorphism<br>( $\theta$ ) | $2.9 \times 10^{-2}$<br>( $\pm 1.2 \times 10^{-2}$ ) | $3.0 \times 10^{-4}$<br>( $\pm 1.5 \times 10^{-4}$ ) | $2.6 \times 10^{-4}$<br>( $\pm 1.3 \times 10^{-4}$ ) | $5.8 \times 10^{-4}$<br>( $\pm 3.1 \times 10^{-4}$ ) |
| Nucleotide diversity ( $\pi$ )          | $2.4 \times 10^{-2}$<br>( $\pm 0.3 \times 10^{-2}$ ) | $1.2 \times 10^{-4}$<br>( $\pm 0.4 \times 10^{-4}$ ) | $1.9 \times 10^{-4}$<br>( $\pm 0.4 \times 10^{-4}$ ) | $5.3 \times 10^{-4}$<br>( $\pm 1.0 \times 10^{-4}$ ) |

Sample numbers, which were used for data analysis, were 10, 17, 14, and 6 for among patches, P1, P2, and P3, respectively. Total number of sites (bp) excluding gaps / missing data were 8,205, 7,760, 8,629, and 8,303 for among patches, P1, P2, and P3, respectively. Standard deviations are in parentheses.

Supplementary Table S4. List of DEGs between TuMV-infected and uninfected plants on spring and autumn equinoxes (SE and AE) in the field seasonal transcriptome. DEGs with adjusted  $P < 0.05$  are listed in the ascending order of  $P$  value. There was no DEG on summer and winter solstices (SS and WS).

| Gene ID<br>(Nagano <i>et al.</i> ,<br>2019) | AGI code for<br><i>Arabidopsis</i><br><i>thaliana</i><br>orthologue | Short description of the orthologue in <i>A. thaliana</i>                                  | Gene alias of the orthologue in <i>A. thaliana</i> | LogFC | Adjusted $P$<br>value | Season |
|---------------------------------------------|---------------------------------------------------------------------|--------------------------------------------------------------------------------------------|----------------------------------------------------|-------|-----------------------|--------|
| Ahg943027                                   | AT4G11650.1                                                         | osmotin 34                                                                                 | <i>ATOSM34,OSM34</i>                               | 2.26  | 5.E-07                | SE     |
| Ahg496228                                   | AT5G60800.1                                                         | Heavy metal transport/detoxification superfamily protein                                   |                                                    | 1.95  | 1.E-05                | SE     |
| Ahg470205                                   | AT1G02450.1                                                         | NIM1-interacting 1                                                                         | <i>NIMIN-1,NIMIN1</i>                              | 2.77  | 9.E-03                | SE     |
| Ahg471490                                   | AT1G13340.1                                                         | Regulator of Vps4 activity in the MVB pathway protein                                      | <i>IST1-LIKE 6,ISTL6</i>                           | 3.97  | 2.E-02                | SE     |
| Ahg356293                                   | -                                                                   | -                                                                                          |                                                    | 4.46  | 2.E-02                | SE     |
| Ahg473645                                   | AT1G31280.1                                                         | Argonaute family protein                                                                   | <i>AGO2</i>                                        | 1.12  | 2.E-02                | SE     |
| Ahg484149                                   | AT2G02230.1                                                         | phloem protein 2-B1                                                                        | <i>AiPP2-B1,PP2-B1</i>                             | 1.35  | 2.E-02                | SE     |
| Ahg486080                                   | AT3G56400.1                                                         | WRKY DNA-binding protein 70                                                                | <i>ATWRKY70,WRKY70</i>                             | 1.61  | 2.E-02                | SE     |
| Ahg486168                                   | AT3G57260.1                                                         | beta-1,3-glucanase 2                                                                       | <i>AiPR2,BG2,BGL2,PR-2,PR2</i>                     | 2.30  | 2.E-02                | SE     |
| Ahg488150                                   | AT5G13320.1                                                         | Auxin-responsive GH3 family protein                                                        | <i>GDG1,GH3.12,PBS3,WIN3</i>                       | 1.33  | 2.E-02                | SE     |
| Ahg495345                                   | AT5G52810.1                                                         | NAD(P)-binding Rossmann-fold superfamily protein                                           |                                                    | 1.14  | 2.E-02                | SE     |
| Ahg940548                                   | AT5G10760.1                                                         | Eukaryotic aspartyl protease family protein                                                |                                                    | 1.85  | 2.E-02                | SE     |
| Ahg350885                                   | AT5G17760.2                                                         | P-loop containing nucleoside triphosphate hydrolases superfamily protein                   |                                                    | 1.15  | 5.E-02                | SE     |
| Ahg486111                                   | AT3G56710.1                                                         | sigma factor binding protein 1                                                             | <i>SIB1</i>                                        | 1.37  | 5.E-02                | SE     |
| Ahg473977                                   | AT1G48410.3                                                         | Stabilizer of iron transporter SufD / Polynucleotidyl transferase                          | <i>AGO1</i>                                        | 1.10  | 2.E-04                | AE     |
| Ahg473645                                   | AT1G31280.1                                                         | Argonaute family protein                                                                   | <i>AGO2</i>                                        | 1.53  | 5.E-04                | AE     |
| Ahg908972                                   | AT1G73602.1                                                         | conserved peptide upstream open reading frame 32                                           | <i>CPuORF32</i>                                    | -2.92 | 5.E-04                | AE     |
| Ahg484149                                   | AT2G02230.1                                                         | phloem protein 2-B1                                                                        | <i>AiPP2-B1,PP2-B1</i>                             | 1.80  | 4.E-03                | AE     |
| Ahg894395                                   | AT1G52030.1                                                         | myrosinase-binding protein 2                                                               | <i>F-ATMBP,MBP1.2,MBP2</i>                         | 5.48  | 4.E-03                | AE     |
| Ahg917381                                   | AT5G56870.1                                                         | beta-galactosidase 4                                                                       | <i>BGAL4</i>                                       | 2.89  | 4.E-03                | AE     |
| Ahg933821                                   | AT2G32530.1                                                         | cellulose synthase-like B3                                                                 | <i>ATCSLB03,ATCSLB3,CSLB03</i>                     | 2.08  | 4.E-03                | AE     |
| Ahg477829                                   | AT3G05400.1                                                         | Major facilitator superfamily protein                                                      |                                                    | -2.02 | 4.E-03                | AE     |
| Ahg474012                                   | AT1G48760.2                                                         | delta-adaptin                                                                              | <i>delta-ADR,PAT4</i>                              | -1.41 | 5.E-03                | AE     |
| Ahg484384                                   | AT3G26170.1                                                         | cytochrome P450, family 71, subfamily B, polypeptide 19                                    | <i>CYP71B19</i>                                    | 3.84  | 5.E-03                | AE     |
| Ahg489420                                   | AT5G25610.1                                                         | BURP domain-containing protein                                                             | <i>ATRD22,RD22</i>                                 | -1.08 | 5.E-03                | AE     |
| Ahg939077                                   | AT3G60420.1                                                         | Phosphoglycerate mutase family protein                                                     |                                                    | 2.51  | 5.E-03                | AE     |
| Ahg943255                                   | AT4G04840.1                                                         | methionine sulfoxide reductase B6                                                          | <i>ATMSRB6,MSRB6</i>                               | -3.25 | 5.E-03                | AE     |
| Ahg479067                                   | AT3G16130.1                                                         | RHO guanyl-nucleotide exchange factor 13                                                   | <i>ATROPGEF13,PIRF2,ROPGEF13</i>                   | -1.01 | 6.E-03                | AE     |
| Ahg918881                                   | AT1G02305.1                                                         | Cysteine proteinases superfamily protein                                                   |                                                    | 1.59  | 6.E-03                | AE     |
| Ahg328029                                   | AT4G37400.1                                                         | cytochrome P450, family 81, subfamily F, polypeptide 3                                     | <i>CYP81F3</i>                                     | -2.13 | 7.E-03                | AE     |
| Ahg480887                                   | AT2G20570.1                                                         | GBF's pro-rich region-interacting factor 1                                                 | <i>ATGLK1,GLK1,GPR1</i>                            | -1.16 | 7.E-03                | AE     |
| Ahg892702                                   | AT5G07700.1                                                         | myb domain protein 76                                                                      | <i>AiMYB76,MYB76</i>                               | -4.40 | 7.E-03                | AE     |
| Ahg919306                                   | AT1G06000.1                                                         | UDP-Glycosyltransferase superfamily protein                                                |                                                    | -2.17 | 7.E-03                | AE     |
| Ahg925873                                   | AT5G25610.1                                                         | BURP domain-containing protein                                                             | <i>ATRD22,RD22</i>                                 | -1.13 | 7.E-03                | AE     |
| Ahg946406                                   | AT4G18010.1                                                         | myo-inositol polyphosphate 5-phosphatase 2                                                 | <i>5PTASE2,AT5PTASE2,IP5PII</i>                    | 1.91  | 7.E-03                | AE     |
| Ahg949787                                   | AT5G52310.1                                                         | low-temperature-responsive protein 78 (LTI78) / desiccation-responsive protein 29A (RD29A) | <i>COR78,LTI140,LTI78,RD29A</i>                    | -2.61 | 7.E-03                | AE     |
| Ahg950218                                   | AT5G55620.1                                                         |                                                                                            |                                                    | -2.65 | 7.E-03                | AE     |
| Ahg323531                                   | AT3G49500.1                                                         | RNA-dependent RNA polymerase 6                                                             | <i>RDR6,SDE1,SGS2</i>                              | 1.12  | 8.E-03                | AE     |
| Ahg478716                                   | AT3G13330.1                                                         | proteasome activating protein 200                                                          | <i>PA200</i>                                       | 1.07  | 8.E-03                | AE     |
| Ahg478884                                   | AT3G14720.1                                                         | MAP kinase 19                                                                              | <i>ATMPK19,MPK19</i>                               | -1.76 | 8.E-03                | AE     |
| Ahg490817                                   | AT4G37980.1                                                         | elicitor-activated gene 3-1                                                                | <i>ATCAD7,CAD7,ELI3,ELI3-1</i>                     | -1.71 | 8.E-03                | AE     |
| Ahg945300                                   | AT4G27520.1                                                         | early nodulin-like protein 2                                                               | <i>AiENODL2,ENODL2</i>                             | -1.75 | 8.E-03                | AE     |
| Ahg471022                                   | AT1G09310.1                                                         | Protein of unknown function, DUF538                                                        |                                                    | -0.92 | 9.E-03                | AE     |
| Ahg487251                                   | AT5G04720.1                                                         | ADR1-like 2                                                                                | <i>ADR1-L2,PHX21</i>                               | 1.04  | 9.E-03                | AE     |
| Ahg929203                                   | AT3G14230.2                                                         | related to AP2 2                                                                           | <i>RAF2.2</i>                                      | 1.01  | 9.E-03                | AE     |
| Ahg488339                                   | AT5G14950.1                                                         | golgi alpha-mannosidase II                                                                 | <i>ATGMII,GMII</i>                                 | 0.92  | 9.E-03                | AE     |
| Ahg471997                                   | AT1G17840.1                                                         | white-brown complex homolog protein 11                                                     | <i>ABCG11,AiABCG11,ATWBC11,COF1,DSO1</i>           | -0.90 | 1.E-02                | AE     |
| Ahg485933                                   | AT3G55120.1                                                         | Chalcone-flavanone isomerase family protein                                                | <i>A11,CF1,TT5,CHI</i>                             | -3.23 | 1.E-02                | AE     |
| Ahg494762                                   | AT5G42720.1                                                         | Glycosyl hydrolase family 17 protein                                                       |                                                    | -1.39 | 1.E-02                | AE     |
| Ahg496967                                   | AT5G66400.1                                                         | Dehydrin family protein                                                                    | <i>ATDI8,RAB18</i>                                 | -3.12 | 1.E-02                | AE     |
| Ahg933965                                   | AT2G33770.1                                                         | phosphate 2                                                                                | <i>ATUBC24,PHO2,UBC24</i>                          | 1.26  | 1.E-02                | AE     |
| Ahg897209                                   | AT4G33790.1                                                         | Jobba acyl CoA reductase-related male sterility protein                                    | <i>CER4,FAR3,G7</i>                                | -2.50 | 1.E-02                | AE     |
| Ahg473464                                   | AT1G32780.1                                                         | GroES-like zinc-binding dehydrogenase family protein                                       |                                                    | -6.67 | 1.E-02                | AE     |
| Ahg934322                                   | AT2G36880.1                                                         | methionine adenosyltransferase 3                                                           | <i>MAT3</i>                                        | -1.17 | 1.E-02                | AE     |
| Ahg491707                                   | AT4G30450.1                                                         | glycine-rich protein                                                                       |                                                    | -2.22 | 1.E-02                | AE     |
| Ahg901436                                   | AT2G35860.1                                                         | FASCI-LIN-like arabinogalactan protein 16 precursor                                        | <i>FLA16</i>                                       | -2.24 | 1.E-02                | AE     |
| Ahg485670                                   | AT3G52960.1                                                         | Thioredoxin superfamily protein                                                            |                                                    | -1.25 | 1.E-02                | AE     |
| Ahg485476                                   | AT3G51240.1                                                         | flavanone 3-hydroxylase                                                                    | <i>F3'H,F3H,TT6</i>                                | -2.78 | 1.E-02                | AE     |
| Ahg937924                                   | AT3G50760.1                                                         | galacturonosyltransferase-like 2                                                           | <i>GATL2</i>                                       | -4.55 | 1.E-02                | AE     |
| Ahg489007                                   | AT5G20960.2                                                         | aldehyde oxidase 1                                                                         | <i>AAO1,AO1,AOalpha,AT-AO1,ATAO,AtAO1</i>          | 1.20  | 1.E-02                | AE     |
| Ahg482978                                   | AT2G39570.1                                                         | ACT domain-containing protein                                                              | <i>ACR9</i>                                        | 1.16  | 2.E-02                | AE     |
| Ahg482040                                   | AT2G31110.2                                                         | Plant protein of unknown function (DUF828)                                                 | <i>TBL40</i>                                       | 2.44  | 2.E-02                | AE     |
| Ahg925482                                   | AT3G20362.1                                                         |                                                                                            |                                                    | -1.58 | 2.E-02                | AE     |
| Ahg939363                                   | AT3G62740.1                                                         | beta glucosidase 7                                                                         | <i>BGLU7</i>                                       | -2.03 | 2.E-02                | AE     |
| Ahg943195                                   | AT4G04020.1                                                         | fibrillin                                                                                  | <i>FIB</i>                                         | -2.51 | 2.E-02                | AE     |
| Ahg482632                                   | AT2G36540.1                                                         | Haloacid dehalogenase-like hydrolase (HAD) superfamily protein                             |                                                    | 1.38  | 2.E-02                | AE     |
| Ahg935883                                   | AT2G01620.1                                                         | RNI-like superfamily protein                                                               | <i>MEE11</i>                                       | 0.91  | 2.E-02                | AE     |
| Ahg471490                                   | AT1G13340.1                                                         | Regulator of Vps4 activity in the MVB pathway protein                                      | <i>IST1-LIKE 6,ISTL6</i>                           | 3.48  | 2.E-02                | AE     |
| Ahg485388                                   | AT3G50370.1                                                         |                                                                                            |                                                    | 0.65  | 2.E-02                | AE     |
| Ahg930439                                   | AT3G23820.1                                                         | UDP-D-glucuronate 4-epimerase 6                                                            | <i>GAE6</i>                                        | -0.85 | 2.E-02                | AE     |
| Ahg481994                                   | AT2G30770.1                                                         | cytochrome P450, family 71, subfamily A, polypeptide 13                                    | <i>CYP71A13</i>                                    | 3.14  | 2.E-02                | AE     |
| Ahg945904                                   | AT4G22240.1                                                         | Plastid-lipid associated protein PAP / fibrillin family protein                            |                                                    | 1.29  | 2.E-02                | AE     |
| Ahg941951                                   | AT5G24160.1                                                         | squalene monooxygenase 6                                                                   | <i>SQE6</i>                                        | -1.53 | 2.E-02                | AE     |
| Ahg939809                                   | AT5G04120.1                                                         | Phosphoglycerate mutase family protein                                                     |                                                    | -3.97 | 2.E-02                | AE     |
| Ahg929130                                   | AT3G13750.1                                                         | beta galactosidase 1                                                                       | <i>BGAL1,BGAL1</i>                                 | 1.39  | 2.E-02                | AE     |
| Ahg942295                                   | AT5G27920.1                                                         | F-box family protein                                                                       |                                                    | 2.87  | 2.E-02                | AE     |
| Ahg944988                                   | AT4G30080.1                                                         | auxin response factor 16                                                                   | <i>ARF16</i>                                       | 1.16  | 2.E-02                | AE     |
| Ahg495611                                   | AT5G55250.1                                                         | IAA carboxylmethyltransferase 1                                                            | <i>AiiAMT1,IAMT1</i>                               | -3.60 | 2.E-02                | AE     |
| Ahg927205                                   | AT1G78000.2                                                         | sulfate transporter 1,2                                                                    | <i>SEL1,SULTR1.2</i>                               | 1.82  | 2.E-02                | AE     |
| Ahg477021                                   | AT1G78570.1                                                         | rhamnose biosynthesis 1                                                                    | <i>ATRHM1,RHM1,ROL1</i>                            | -1.52 | 3.E-02                | AE     |
| Ahg935524                                   | AT2G45660.1                                                         | AGAMOUS-like 20                                                                            | <i>AGL20,ATSOC1,SOC1</i>                           | 1.51  | 3.E-02                | AE     |
| Ahg914721                                   | AT1G55910.1                                                         | zinc transporter 11 precursor                                                              | <i>ZIP11</i>                                       | -1.04 | 3.E-02                | AE     |
| Ahg346572                                   | AT2G47730.1                                                         | glutathione S-transferase phi 8                                                            | <i>ATGSTF5,ATGSTF8,GST6,GSTF8</i>                  | -1.01 | 3.E-02                | AE     |
| Ahg356368                                   | AT5G46330.1                                                         | Leucine-rich receptor-like protein kinase family protein                                   | <i>FLS2</i>                                        | 2.19  | 3.E-02                | AE     |
| Ahg481471                                   | AT2G26150.1                                                         | heat shock transcription factor A2                                                         | <i>ATHSFA2,HSAF2</i>                               | -6.15 | 3.E-02                | AE     |
| Ahg487705                                   | AT5G08640.1                                                         | flavonol synthase 1                                                                        | <i>ATFLS1,FLS,FLS1</i>                             | -2.27 | 3.E-02                | AE     |
| Ahg490638                                   | AT4G38740.1                                                         | rotamase CYP 1                                                                             | <i>ROC1</i>                                        | -1.27 | 3.E-02                | AE     |
| Ahg891467                                   | AT5G41900.1                                                         | alpha/beta-Hydrolases superfamily protein                                                  |                                                    | -4.31 | 3.E-02                | AE     |
| Ahg930777                                   | AT2G04570.1                                                         | GDSL-like Lipase/Acylhydrolase superfamily protein                                         |                                                    | -1.73 | 3.E-02                | AE     |
| Ahg946531                                   | AT4G17030.1                                                         | expansin-like B1                                                                           | <i>AT-EXPR,ATEXLB1,ATEXPRI1,ATHEXP BE1</i>         | -2.37 | 3.E-02                | AE     |
| Ahg899338                                   | AT3G63440.1                                                         | cytokinin oxidase/dehydrogenase 6                                                          | <i>ATCKX6,ATCKX7,CKX6</i>                          | -2.38 | 3.E-02                | AE     |
| Ahg474340                                   | AT1G52230.1                                                         | photosystem I subunit H2                                                                   | <i>PSAH2,PSAH2,PSI-H</i>                           | -0.75 | 4.E-02                | AE     |
| Ahg938584                                   | AT3G56290.1                                                         |                                                                                            |                                                    | -3.51 | 4.E-02                | AE     |
| Ahg488652                                   | AT5G17860.1                                                         | calcium exchanger 7                                                                        | <i>CAX7</i>                                        | 1.96  | 4.E-02                | AE     |
| Ahg937908                                   | AT3G50685.1                                                         |                                                                                            |                                                    | -0.83 | 4.E-02                | AE     |
| Ahg948884                                   | AT5G43150.1                                                         |                                                                                            |                                                    | -2.08 | 4.E-02                | AE     |
| Ahg478305                                   | AT3G09820.1                                                         | adenosine kinase 1                                                                         | <i>ADK1,ATADK1</i>                                 | -1.07 | 4.E-02                | AE     |
| Ahg488016                                   | AT5G11790.1                                                         | N-MYC downregulated-like 2                                                                 | <i>NDL2</i>                                        | -1.43 | 4.E-02                | AE     |
| Ahg490836                                   | AT4G37800.1                                                         | xyloglucan endotransglucosylase/hydrolase 7                                                | <i>XTH7</i>                                        | -1.56 | 4.E-02                | AE     |
| Ahg947030                                   | AT4G13930.1                                                         | serine hydroxymethyltransferase 4                                                          | <i>SHM4</i>                                        | -0.94 | 4.E-02                | AE     |
| Ahg475149                                   | AT1G61800.1                                                         | glucose-6-phosphate/phosphate translocator 2                                               | <i>ATGPT2,GPT2</i>                                 | -4.75 | 4.E-02                | AE     |
| Ahg486810                                   | AT3G63060.1                                                         | EID1-like 3                                                                                | <i>EDL3</i>                                        | -4.46 | 4.E-02                | AE     |
| Ahg949485                                   | AT5G49740.1                                                         | ferric reduction oxidase 7                                                                 | <i>ATFRO7,FRO7</i>                                 | 0.86  | 4.E-02                | AE     |
| Ahg950456                                   | AT5G57655.2                                                         | xylose isomerase family protein                                                            |                                                    | 0.92  | 4.E-02                | AE     |

|           |             |                                                                                        |                           |       |           |
|-----------|-------------|----------------------------------------------------------------------------------------|---------------------------|-------|-----------|
| Ahg490167 | AT4G05180.1 | photosystem II subunit Q-2                                                             | <i>PSBQ,PSBQ-2,PSII-Q</i> | -0.70 | 5.E-02 AE |
| Ahg482690 | AT2G37040.1 | PHE ammonia lyase 1                                                                    | <i>ATPAL1,PAL1</i>        | -1.63 | 5.E-02 AE |
| Ahg316086 | AT1G71000.1 | Chaperone DnaJ-domain superfamily protein                                              |                           | -6.33 | 5.E-02 AE |
| Ahg326101 | AT4G22100.1 | beta glucosidase 2                                                                     | <i>BGLU3</i>              | -2.08 | 5.E-02 AE |
| Ahg326139 | AT5G17050.1 | UDP-glucosyl transferase 78D2                                                          | <i>UGT78D2</i>            | -1.73 | 5.E-02 AE |
| Ahg341522 | AT3G13900.1 | ATPase E1-E2 type family protein / haloacid dehalogenase-like hydrolase family protein |                           | 2.28  | 5.E-02 AE |
| Ahg475766 | AT1G66700.1 | S-adenosyl-L-methionine-dependent methyltransferases superfamily protein               | <i>PXMT1</i>              | 2.78  | 5.E-02 AE |
| Ahg479246 | AT3G17650.1 | YELLOW STRIPE like 5                                                                   | <i>PDE321,YSL5</i>        | 0.72  | 5.E-02 AE |
| Ahg483684 | AT2G45470.1 | FASCICLIN-like arabinogalactan protein 8                                               | <i>AGP8,FLA8</i>          | -1.19 | 5.E-02 AE |
| Ahg484456 | AT3G26810.1 | auxin signaling F-box 2                                                                | <i>AFB2</i>               | 0.81  | 5.E-02 AE |
| Ahg491000 | AT4G36360.1 | beta-galactosidase 3                                                                   | <i>BGAL3</i>              | -1.26 | 5.E-02 AE |
| Ahg937262 | -           | -                                                                                      |                           | 3.38  | 5.E-02 AE |
| Ahg941077 | AT5G15870.1 | glycosyl hydrolase family 81 protein                                                   |                           | 1.09  | 5.E-02 AE |

Supplementary Table S5. GO (gene ontology) analyses for SE and AE DEGs between TuMV-infected and -uninfected plants in the field seasonal transcriptome. Enriched GOs for up-regulated DEGs in SE and down-regulated DEGs in AE are listed. There were no down-regulated DEGs in SE, and no enriched GO for up-regulated DEGs in AE. Adjusted  $P < 0.01$ .

| Season | ID         | Description                                             | Number<br>of DEG <sup>a</sup> | A <sup>b</sup> | B <sup>c</sup> | U <sup>d</sup> | Adjusted<br><i>P</i> |
|--------|------------|---------------------------------------------------------|-------------------------------|----------------|----------------|----------------|----------------------|
| SE     | GO:0042742 | Defence response to bacterium                           | 4                             | 13             | 317            | 26927          | 3.7.E-02             |
|        | GO:0009816 | Defence response to bacterium, incompatible interaction | 3                             | 13             | 54             | 26927          | 1.4.E-02             |
|        | GO:0010112 | Regulation of systemic acquired resistance              | 2                             | 13             | 13             | 26927          | 3.7.E-02             |
| AE     | GO:0080167 | Response to karrikin                                    | 6                             | 62             | 143            | 26927          | 6.5.E-03             |
|        | GO:0009813 | Favonoid biosynthetic process                           | 4                             | 62             | 41             | 26927          | 8.1.E-03             |
|        | GO:0055114 | Oxidation-reduction process                             | 12                            | 62             | 1264           | 26927          | 4.5.E-02             |
|        | GO:0009269 | Response to desiccation                                 | 3                             | 62             | 28             | 26927          | 4.9.E-02             |
|        | GO:0045486 | Naringenin 3-dioxygenase activity                       | 2                             | 62             | 2              | 26927          | 1.2.E-02             |

a: DEGs in the corresponding GO

b: Total numbers of up-regulated DEGs in SE and down-regulated DEGs in AE

c: Genes in the corresponding GO

d: Total number of annotated genes
